# Supplementary material
Source: PubMed Central journal article supplement (PMC3185066)
Supplement: NIHMS315318-supplement-01.pdf [file NIHMS315318-supplement-01.pdf]

# THE LANCET **Oncology**

## **Supplementary webappendix**

This webappendix formed part of the original submission and has been peer reviewed. We post it as supplied by the authors.

Supplement to: Chochinov HM, Kristjanson LJ, Breitbart W, et al. Effect of dignity therapy on distress and end-of-life experience in terminally ill patients: a randomised controlled trial. *Lancet Oncol* 2011; published online July 7. DOI:10.1016/S1470-2045(11)70153-X.

## Dignity Therapy Patient Feedback Questionnaire

We would appreciate your feedback and impressions of the Dignity Therapy Intervention. Please answer the following questions:

1. I have found Dignity Therapy to be helpful to me.

Strongly  
Disagree

Disagree

Neither Agree  
Nor Disagree

Strongly  
Agree

Agree

What are your reasons for that opinion?

---

---

---

2. I have found Dignity Therapy to be as helpful as any other aspect of my health care.

Strongly  
Disagree

Disagree

Neither Agree  
Nor Disagree

Strongly  
Agree

Agree

What are your reasons for that opinion?

---

---

---

3. I believe Dignity Therapy has improved my quality of life.

Strongly  
Disagree

Disagree

Neither Agree  
Nor Disagree

Strongly  
Agree

Agree

What are your reasons for that opinion?

---

---

---

4. Dignity Therapy has given me a sense of looking after unfinished business.

Strongly  
Disagree

Disagree

Neither Agree  
Nor Disagree

Strongly  
Agree

Agree

What are your reasons for that opinion?

---

---

---

5. Dignity Therapy has improved my sense of spiritual well being.

Strongly  
Disagree

Disagree

Neither Agree  
Nor Disagree

Strongly  
Agree

Agree

What are your reasons for that opinion?

---

---

---

6. Dignity Therapy has lessened my sense of sadness or depression.

Strongly  
Disagree

Disagree

Neither Agree  
Nor Disagree

Strongly  
Agree

Agree

What are your reasons for that opinion?

---

---

---

7. Dignity Therapy has lessened my sense of feeling a burden to others.

Strongly  
Disagree

Disagree

Neither Agree  
Nor Disagree

Strongly  
Agree

Agree

What are your reasons for that opinion?

---

---

---

8. Dignity Therapy has made me feel more worthwhile or valued.

Strongly  
Disagree

Disagree

Neither Agree  
Nor Disagree

Strongly  
Agree

Agree

What are your reasons for that opinion?

---

---

---

9. Dignity Therapy has made me feel like I am still me.

Strongly  
Disagree

Disagree

Neither Agree  
Nor Disagree

Strongly  
Agree

Agree

What are your reasons for that opinion?

---

---

---

10. Dignity Therapy has given me a greater sense of having control over my life.

Strongly  
Disagree

Disagree

Neither Agree  
Nor Disagree

Strongly  
Agree

Agree

What are your reasons for that opinion?

---

---

---

11. Dignity Therapy has helped me to accept the way things are.

Strongly  
Disagree

Disagree

Neither Agree  
Nor Disagree

Strongly  
Agree

Agree

What are your reasons for that opinion?

---

---

---

12. Dignity Therapy has made me feel more respected and understood by others.

Strongly  
Disagree

Disagree

Neither Agree  
Nor Disagree

Strongly  
Agree

Agree

What are your reasons for that opinion?

---

---

---

13. Dignity Therapy has made me feel that I still am able to carry out an important task or fill an important role.

Strongly  
Disagree

Disagree

Neither Agree  
Nor Disagree

Strongly  
Agree

Agree

What are your reasons for that opinion?

---

---

---

14. I have found the Dignity Therapy to be satisfactory.

---

---

Strongly  
Disagree

Disagree

Neither Agree  
Nor Disagree

Strongly  
Agree

Agree

What are your reasons for that opinion?

---

---

---

15. Dignity Therapy made me feel that my life currently is more meaningful.

---

Strongly  
Disagree

Disagree

Neither Agree  
Nor Disagree

Strongly  
Agree

Agree

What are your reasons for that opinion?

---

---

---

16. Dignity Therapy has given me a heightened sense of purpose.

---

Strongly  
Disagree

Disagree

Neither Agree  
Nor Disagree

Strongly  
Agree

Agree

What are your reasons for that opinion?

---

---

---

17. Dignity Therapy has given me a heightened sense of dignity.

---

Strongly  
Disagree

Disagree

Neither Agree  
Nor Disagree

Strongly  
Agree

Agree

What are your reasons for that opinion?

---

---

---

18. Dignity Therapy has lessened my sense of suffering.

---

Strongly  
Disagree

Disagree

Neither Agree  
Nor Disagree

Strongly  
Agree

Agree

What are your reasons for that opinion?

---

---

---

19. Dignity Therapy has increased my will to live.

Strongly  
Disagree

Disagree

Neither Agree  
Nor Disagree

Strongly  
Agree

Agree

What are your reasons for that opinion?

---

---

---

20. I believe Dignity Therapy has or will be of help to my family.

Strongly  
Disagree

Disagree

Neither Agree  
Nor Disagree

Strongly  
Agree

Agree

What are your reasons for that opinion?

---

---

---

21. I believe Dignity Therapy could change the way my family sees or appreciates me.

Strongly  
Disagree

Disagree

Neither Agree  
Nor Disagree

Strongly  
Agree

Agree

What are your reasons for that opinion?

---

---

---

22. I believe Dignity Therapy could change the way my health care providers see or appreciate me.

Strongly  
Disagree

Disagree

Neither Agree  
Nor Disagree

Strongly  
Agree

Agree

What are your reasons for that opinion?

---

---

---

23. In general, I have been satisfied with my psychosocial care.

---

Strongly  
Disagree

Disagree

Neither Agree  
Nor Disagree

Strongly  
Agree

Agree

What are your reasons for that opinion?

---

---

---

Any other comments regarding your experience of Dignity Therapy, and how you think it might be improved, would be most appreciated.

---

---

---

---

---

# Client Centered Patient Feedback Questionnaire

Patient Name: \_\_\_\_\_

Date: \_\_\_\_\_

We would appreciate your feedback and impressions of the Client Centered Intervention. Please answer the following questions:

1. I have found the Client Centered Intervention to be helpful to me.

Strongly  
Disagree

Disagree

Neither Agree  
Nor Disagree

Strongly  
Agree

Agree

What are your reasons for that opinion?

---

---

---

2. I have found the Client Centered Intervention to be as helpful as any other aspect of my health care.

Strongly  
Disagree

Disagree

Neither Agree  
Nor Disagree

Strongly  
Agree

Agree

What are your reasons for that opinion?

---

---

---

3. I believe the Client Centered Intervention has improved my quality of life.

Strongly  
Disagree

Disagree

Neither Agree  
Nor Disagree

Strongly  
Agree

Agree

What are your reasons for that opinion?

---

---

---

4. The Client Centered Intervention has given me a sense of looking after unfinished business.

Strongly  
Disagree

Disagree

Neither Agree  
Nor Disagree

Strongly  
Agree

Agree

What are your reasons for that opinion?

---

---

---



5. The Client Centered Intervention has improved my sense of spiritual well being.

Strongly  
Disagree

Disagree

Neither Agree  
Nor Disagree

Strongly  
Agree

Agree

What are your reasons for that opinion?

---

---

---

6. The Client Centered Intervention has lessened my sense of sadness or depression.

Strongly  
Disagree

Disagree

Neither Agree  
Nor Disagree

Strongly  
Agree

Agree

What are your reasons for that opinion?

---

---

---

7. The Client Centered Intervention has lessened my sense of feeling a burden to others.

Strongly  
Disagree

Disagree

Neither Agree  
Nor Disagree

Strongly  
Agree

Agree

What are your reasons for that opinion?

---

---

---

8. The Client Centered Intervention has made me feel more worthwhile or valued.

Strongly  
Disagree

Disagree

Neither Agree  
Nor Disagree

Strongly  
Agree

Agree

What are your reasons for that opinion?

---

---

---

9. The Client Centered Intervention has made me feel like I am still me.

Strongly  
Disagree

Disagree

Neither Agree  
Nor Disagree

Strongly  
Agree

Agree

What are your reasons for that opinion?

---

---

---

10. The Client Centered Intervention has given me a greater sense of having control over my life.

---

Strongly  
Disagree

Disagree

Neither Agree  
Nor Disagree

Strongly  
Agree

Agree

What are your reasons for that opinion?

---

---

---

11. The Client Centered Intervention has helped me to accept the way things are.

---

Strongly  
Disagree

Disagree

Neither Agree  
Nor Disagree

Strongly  
Agree

Agree

What are your reasons for that opinion?

---

---

---

12. The Client Centered Intervention has made me feel more respected and understood by others.

---

Strongly  
Disagree

Disagree

Neither Agree  
Nor Disagree

Strongly  
Agree

Agree

What are your reasons for that opinion?

---

---

---

13. The Client Centered Intervention has made me feel that I still am able to carry out an important task or fill an important role.

---

Strongly  
Disagree

Disagree

Neither Agree  
Nor Disagree

Strongly  
Agree

Agree

What are your reasons for that opinion?

---

---

---

14. I have found the Client Centered Intervention to be satisfactory.

---

Strongly  
Disagree

Disagree

Neither Agree  
Nor Disagree

Strongly  
Agree

Agree

What are your reasons for that opinion?

---

---

---

15. The Client Centered Intervention made me feel that my life currently is more meaningful.

---

Strongly  
Disagree

Disagree

Neither Agree  
Nor Disagree

Strongly  
Agree

Agree

What are your reasons for that opinion?

---

---

---

16. The Client Centered Intervention has given me a heightened sense of purpose.

---

Strongly  
Disagree

Disagree

Neither Agree  
Nor Disagree

Strongly  
Agree

Agree

What are your reasons for that opinion?

---

---

---

17. The Client Centered Intervention has given me a heightened sense of dignity.

---

Strongly  
Disagree

Disagree

Neither Agree  
Nor Disagree

Strongly  
Agree

Agree

What are your reasons for that opinion?

---

---

---

18. The Client Centered Intervention has lessened my sense of suffering.

---

Strongly  
Disagree

Disagree

Neither Agree  
Nor Disagree

Strongly  
Agree

Agree

What are your reasons for that opinion?

---

---

---

19. The Client Centered Intervention has increased my will to live.

Strongly  
Disagree

Disagree

Neither Agree  
Nor Disagree

Strongly  
Agree

Agree

What are your reasons for that opinion?

---

---

---

20. I believe the Client Centered Intervention has or will be of help to my family.

Strongly  
Disagree

Disagree

Neither Agree  
Nor Disagree

Strongly  
Agree

Agree

What are your reasons for that opinion?

---

---

---

21. I believe my participation in the Client Centered Intervention could change the way my family sees or appreciates me.

Strongly  
Disagree

Disagree

Neither Agree  
Nor Disagree

Strongly  
Agree

Agree

What are your reasons for that opinion?

---

---

---

22. I believe my participation in the Client Centered Intervention could change the way my health care providers see or appreciate me.

Strongly  
Disagree

Disagree

Neither Agree  
Nor Disagree

Strongly  
Agree

Agree

What are your reasons for that opinion?

---

---

---

23. In general, I have been satisfied with my psychosocial care.

---

---

Strongly  
Disagree

Disagree

Neither Agree  
Nor Disagree

Strongly  
Agree

Agree

What are your reasons for that opinion?

---

---

---

Any other comments regarding your experience of the Client Centered Intervention, and how you think it might be improved, would be most appreciated.

---

---

---

---

---

# Standard Palliative Care Patient Feedback Questionnaire

Patient Name: \_\_\_\_\_

Date: \_\_\_\_\_

We would appreciate your feedback and impressions of the study you participated in. Please answer the following questions:

1. I have found the Palliative Care Support Study was helpful to me.

Strongly  
Disagree

Disagree

Neither Agree  
Nor Disagree

Strongly  
Agree

Agree

What are your reasons for that opinion?

---

---

---

2. I have found the Palliative Care Support Study to be as helpful as any other aspect of my health care.

Strongly  
Disagree

Disagree

Neither Agree  
Nor Disagree

Strongly  
Agree

Agree

What are your reasons for that opinion?

---

---

---

3. I believe the Palliative Care Support Study has improved my quality of life .

Strongly  
Disagree

Disagree

Neither Agree  
Nor Disagree

Strongly  
Agree

Agree

What are your reasons for that opinion?

---

---

---

4. The Palliative Care Support Study has given me a sense of looking after unfinished business.

Strongly  
Disagree

Disagree

Neither Agree  
Nor Disagree

Strongly  
Agree

Agree

What are your reasons for that opinion?

---

---

---

5. The Palliative Care Support Study has improved my sense of spiritual well being.

---

Strongly  
Disagree

Disagree

Neither Agree  
Nor Disagree

Strongly  
Agree

Agree

What are your reasons for that opinion?

---

---

---

6. The Palliative Care Support Study has lessened my sense of sadness or depression.

---

Strongly  
Disagree

Disagree

Neither Agree  
Nor Disagree

Strongly  
Agree

Agree

What are your reasons for that opinion?

---

---

---

7. The Palliative Care Support Study has lessened my sense of feeling a burden to others.

---

Strongly  
Disagree

Disagree

Neither Agree  
Nor Disagree

Strongly  
Agree

Agree

What are your reasons for that opinion?

---

---

---

8. The Palliative Care Support Study has made me feel more worthwhile or valued.

---

Strongly  
Disagree

Disagree

Neither Agree  
Nor Disagree

Strongly  
Agree

Agree

What are your reasons for that opinion?

---

---

---

9. The Palliative Care Support Study has made me feel like I am still me.

---

Strongly  
Disagree

Disagree

Neither Agree  
Nor Disagree

Strongly  
Agree

Agree

What are your reasons for that opinion?

---

---

---

10. The Palliative Care Support Study has given me a greater sense of having control over my life.

---

Strongly  
Disagree

Disagree

Neither Agree  
Nor Disagree

Strongly  
Agree

Agree

What are your reasons for that opinion?

---

---

---

11. The Palliative Care Support Study has helped me to accept the way things are.

---

Strongly  
Disagree

Disagree

Neither Agree  
Nor Disagree

Strongly  
Agree

Agree

What are your reasons for that opinion?

---

---

---

12. The Palliative Care Support Study has made me feel more respected and understood by others.

---

Strongly  
Disagree

Disagree

Neither Agree  
Nor Disagree

Strongly  
Agree

Agree

What are your reasons for that opinion?

---

---

---

13. The Palliative Care Support Study has made me feel that I still am able to carry out an important task or fill an important role.

---

Strongly  
Disagree

Disagree

Neither Agree  
Nor Disagree

Strongly  
Agree

Agree

What are your reasons for that opinion?

---

---

---

14. I have found the Palliative Care Support Study to be satisfactory.



---

Strongly  
Disagree

Disagree

Neither Agree  
Nor Disagree

Strongly  
Agree

Agree

What are your reasons for that opinion?

---

---

---

15. The Palliative Care Support Study made me feel that my life currently is more meaningful.

---

Strongly  
Disagree

Disagree

Neither Agree  
Nor Disagree

Strongly  
Agree

Agree

What are your reasons for that opinion?

---

---

---

16. The Palliative Care Support Study has given me a heightened sense of purpose.

---

Strongly  
Disagree

Disagree

Neither Agree  
Nor Disagree

Strongly  
Agree

Agree

What are your reasons for that opinion?

---

---

---

17. The Palliative Care Support Study has given me a heightened sense of dignity.

---

Strongly  
Disagree

Disagree

Neither Agree  
Nor Disagree

Strongly  
Agree

Agree

What are your reasons for that opinion?

---

---

---

18. The Palliative Care Support Study has lessened my sense of suffering.

---

Strongly  
Disagree

Disagree

Neither Agree  
Nor Disagree

Strongly  
Agree

Agree

What are your reasons for that opinion?

---

---

---

19. The Palliative Care Support Study has increased my will to live.

Strongly  
Disagree

Disagree

Neither Agree  
Nor Disagree

Strongly  
Agree

Agree

What are your reasons for that opinion?

---

---

---

20. I believe the Palliative Care Support Study has or will be of help to my family.

Strongly  
Disagree

Disagree

Neither Agree  
Nor Disagree

Strongly  
Agree

Agree

What are your reasons for that opinion?

---

---

---

21. I believe the Palliative Care Support Study could change the way my family sees or appreciates me.

Strongly  
Disagree

Disagree

Neither Agree  
Nor Disagree

Strongly  
Agree

Agree

What are your reasons for that opinion?

---

---

---

22. I believe the Palliative Care Support Study could change the way my health care providers see or appreciate me.

Strongly  
Disagree

Disagree

Neither Agree  
Nor Disagree

Strongly  
Agree

Agree

What are your reasons for that opinion?

---

---

---

23. In general, I have been satisfied with my psychosocial care.

---

---

Strongly  
Disagree

Disagree

Neither Agree  
Nor Disagree

Strongly  
Agree

Agree

What are your reasons for that opinion?

---

---

---

Any other comments regarding your experience of the Palliative Care Support Study, and how you think it might be improved, would be most appreciated.

---

---

---

---

---
